# Supplementary material for: Light-directed on-chip shape transformation of a single gold nanoparticle
Source: Royal Society of Chemistry journal article supplement (doi:10.1039/d0tc04195e), 2020-01-01
Supplement: d0tc04195e1.pdf [file d0tc04195e1.pdf]

## Electronic Supplementary Information for

### Light-directed on-chip shape transformation of a single gold nanoparticle

Yinfeng Long<sup>a</sup>, Shuangshuang Wang<sup>a</sup>, Yunxia Wang<sup>a</sup>, Yan Qiao<sup>\*b</sup> and Tao Ding<sup>\*a</sup>

<sup>a</sup>Key Laboratory of Artificial Micro- and Nano-structures of Ministry of Education of China, School of Physics and Technology, Wuhan University. Wuhan, 430072 China.

\*Email: [t.ding@whu.edu.cn](mailto:t.ding@whu.edu.cn)

<sup>b</sup> Beijing National Laboratory for Molecular Sciences, CAS Research/Education Center for Excellence in Molecular Sciences, Institute of Chemistry, Chinese Academy of Sciences, Beijing 100190, China.

\*Email: [yanqiao@iccas.ac.cn](mailto:yanqiao@iccas.ac.cn)

**Table S1** Geometry setting of different shaped Au NPs (simplified from the SEM images in Figure 1c) for FDTD simulations

| Time (s)                | 0                                                                                 | 4                                                                                 | 6                                                                                  | 10                                                                                  |
|-------------------------|-----------------------------------------------------------------------------------|-----------------------------------------------------------------------------------|------------------------------------------------------------------------------------|-------------------------------------------------------------------------------------|
| FDTD Geometry           | 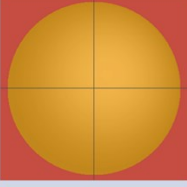 |  |  |  |
|                         | Sphere                                                                            | Hexagon                                                                           | Pentagon                                                                           | Prism                                                                               |
| Size (nm)               | $\Phi 85$                                                                         | $\Phi 80, 45*20^a$                                                                | $\Phi 76, 46*20^a$                                                                 | $90*60$                                                                             |
| Volume( $\text{nm}^3$ ) | $3.2*10^5$                                                                        | $3.4*10^5$                                                                        | $2.9*10^5$                                                                         | $3.1*10^5$                                                                          |

a) Size of the facet in a format of  $l*h$ . Here  $l$  is the length of the facet while  $h$  is the height of the facet.

**Table S2** Laser-induced growth, etching and ripening of Au NPs under different irradiation conditions

| Power (mW)<br>Conc. (mM) <sup>a</sup> | 1           | 2           | 3           | 4           |
|---------------------------------------|-------------|-------------|-------------|-------------|
| 5                                     | growth      | growth      | growth      | ripening    |
| 25                                    | growth      | growth      | ripening    | ripening    |
| 50                                    | dissolution | dissolution | dissolution | dissolution |

a) Concentration of  $\text{HAuCl}_4$  in aqueous solution.

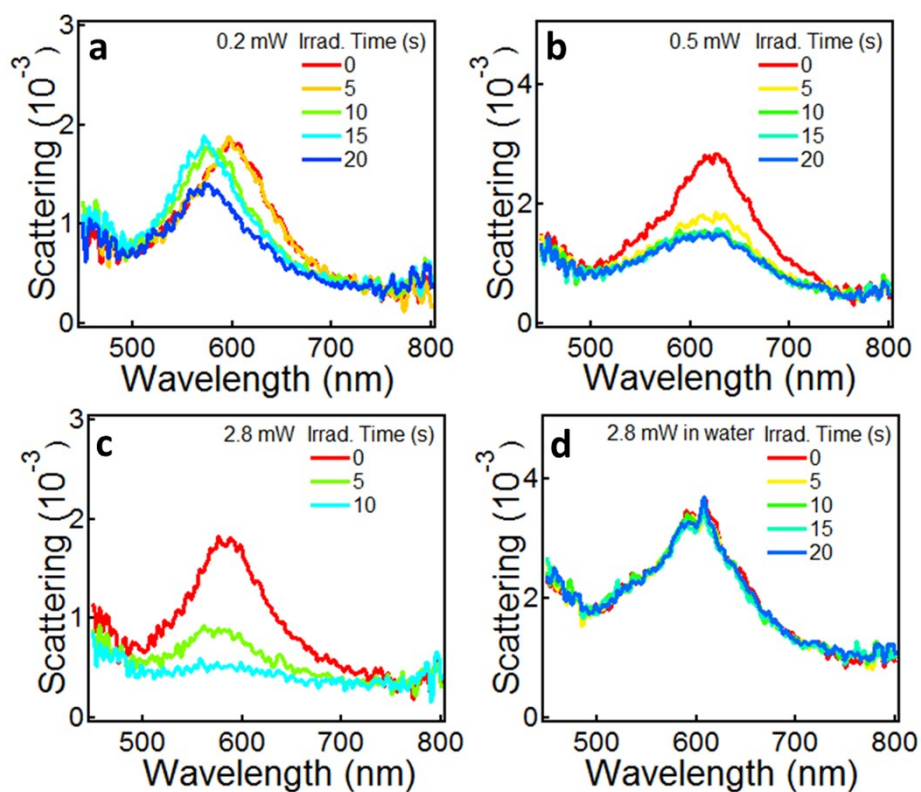

**Fig. S1** (a-c) Dark field scattering spectra showing kinetics of AuNPs in  $\text{HAuCl}_4$  solution (25 mM) at different irradiation powers. (a) 0.2 mW, (b) 0.5 mW, (c) 2.8 mW. (d) Dark field scattering kinetics of AuNPs in water as a control at irradiation power of 2.8 mW.

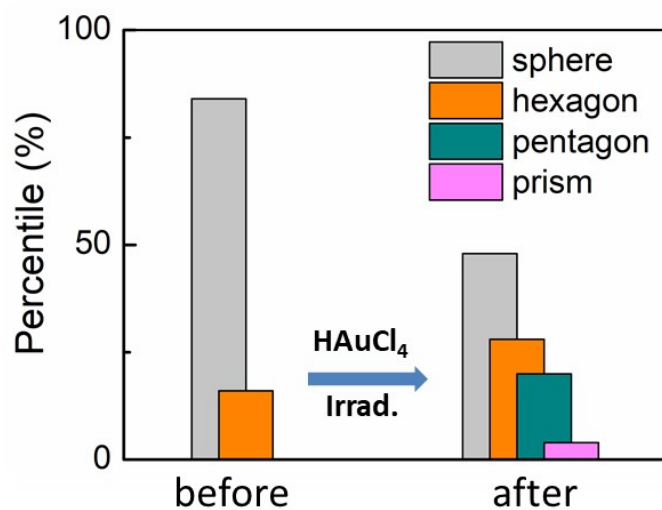

**Fig. S2** The statistic histogram of Au NPs shape before and after the irradiation.  $\text{HAuCl}_4$ . Concentration: 20 mM. Irradiation power: 4 mW.

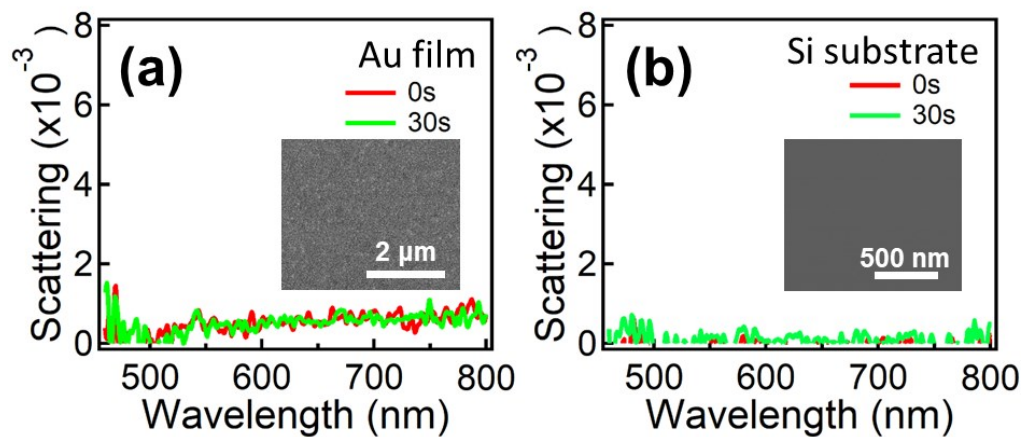

**Fig. S3** Scattering spectra before and after laser irradiation (a) on Au film.  $\text{HAuCl}_4$ . Concentration: 50 mM. Irradiation power: 8 mW. (b) on Si substrate.  $\text{HAuCl}_4$ . Concentration: 25 mM. Irradiation power: 8 mW.

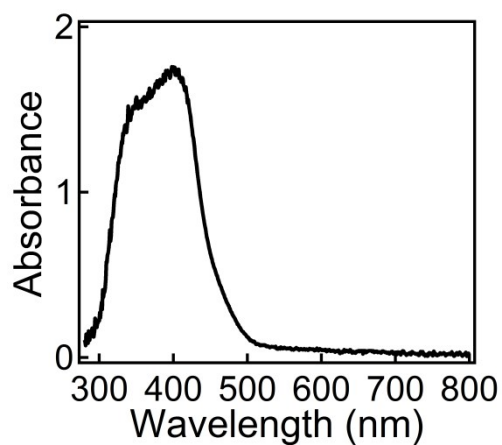

**Fig. S4** UV-Vis absorbance of  $\text{HAuCl}_4$  aqueous solution (10 mM).

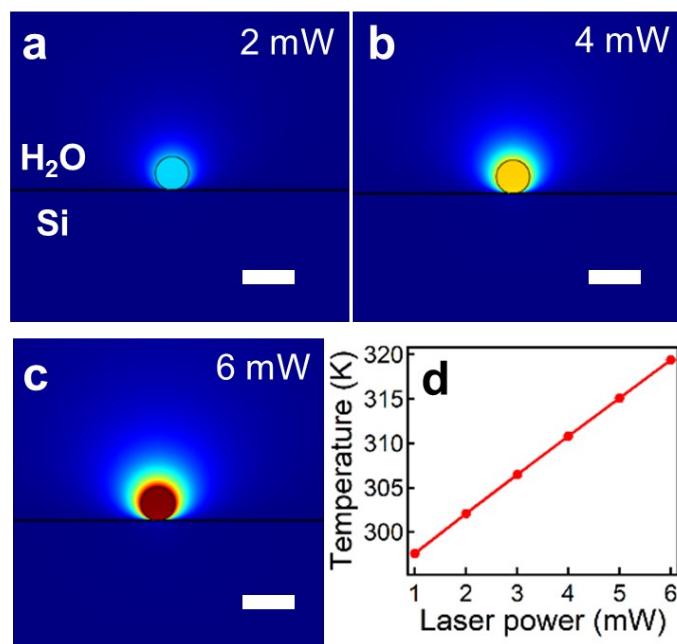

**Fig. S5** Temperature distribution around Au NPs on Si substrate with water medium. Irradiation power: (a) 2 mW, (b) 4 mW, (c) 6 mW. Scale bars are 100 nm. (d) Change of Au surface temperature with irradiation power.

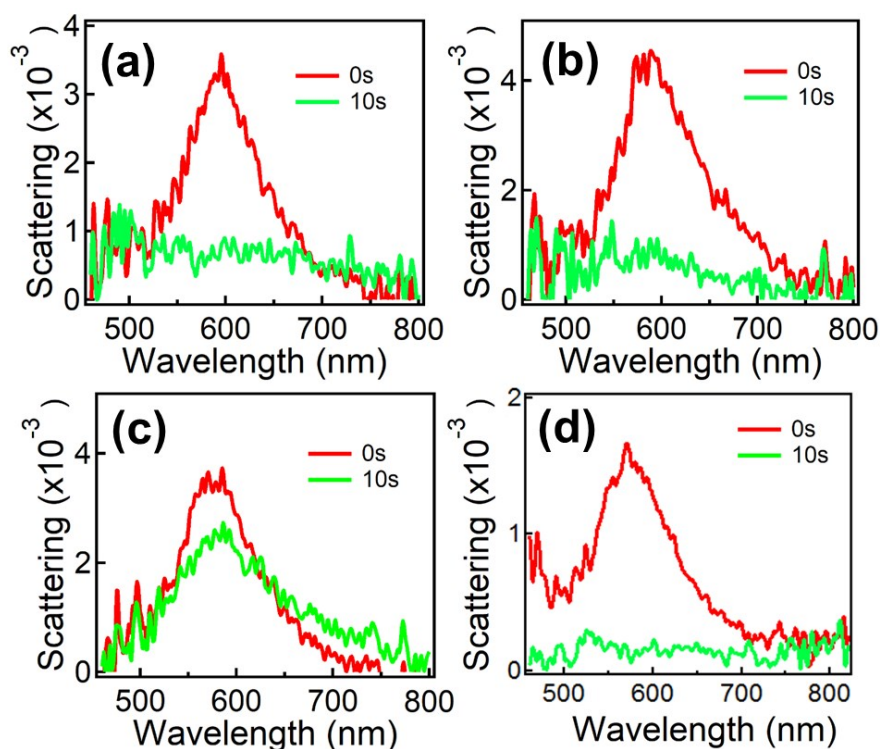

**Fig. S6** Scattering spectra of Au NPs before and after the irradiation under different conditions. (a) in 5 mM  $\text{HAuCl}_4$  solution containing 50 mM HCl. (b) in 5 mM  $\text{HAuCl}_4$  solution containing 50 mM NaCl. (c) in 50 mM  $\text{NaAuCl}_4$  solution (pH=6). (d) in 50 mM  $\text{HAuCl}_4$  solution.

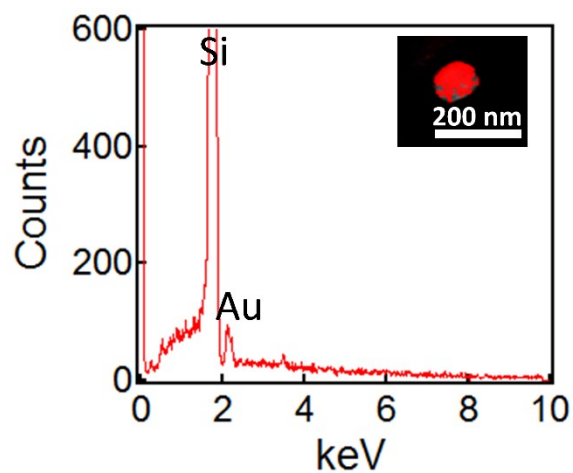

**Fig. S7** The EDX spectrum of the irradiated Au NP on Si substrate. Inset is the EDX mapping of Au element overlapping with the SEM image.

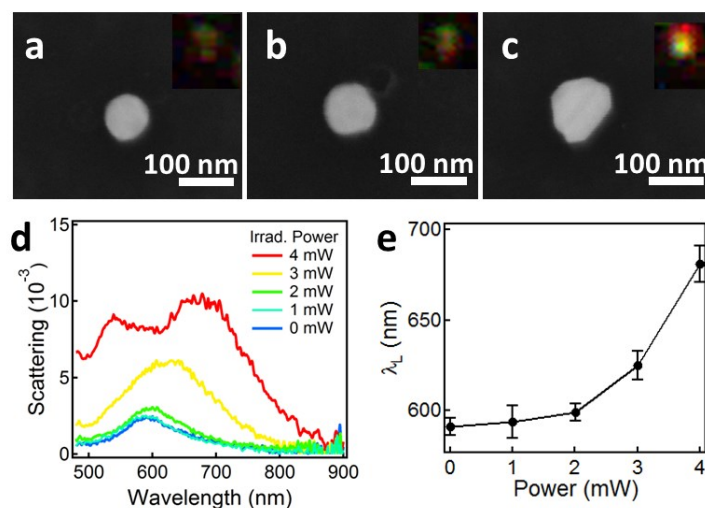

**Fig. S8** Power dependent growth of Au NPs in the presence of  $\text{HAuCl}_4$  solution (5mM). (a-c) SEM images of Au NPs after the irradiation (30 s). irradiation power: a) 2 mW, b) 3 mW, c) 4 mW. d) Change of scattering spectra with irradiation power. and e) the corresponding change of the plasmon peaks.

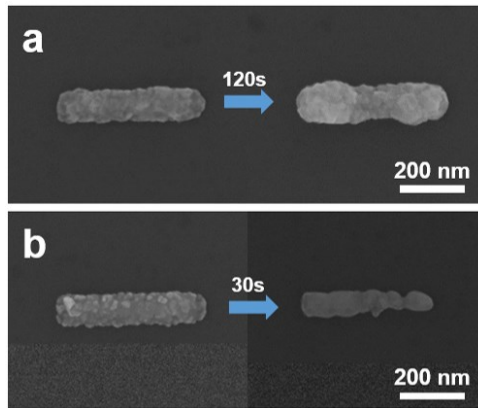

**Fig. S9** SEM images of Au nanorods (NRs) before and after the laser irradiation. Irradiation power: 1 mW.  $\text{HAuCl}_4$ . Concentration: (a): 10 mM. (b): 30 mM. The Au NRs were fabricated via e-beam lithography without any surface ligands. The irradiation results show similar trend as Au NPs: higher concentration of  $\text{HAuCl}_4$  leads to etching of the Au NRs while lower concentration  $\text{HAuCl}_4$  leads to growth at ends.

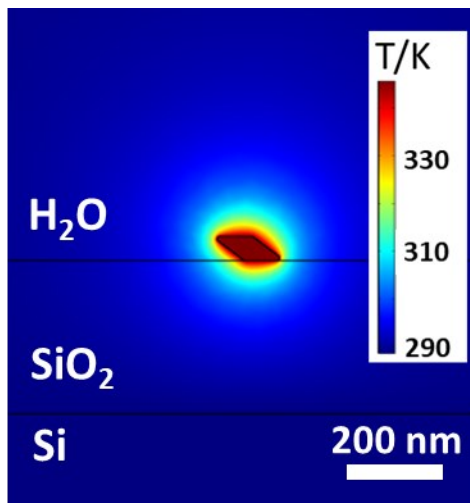

**Fig. S10** Temperature distribution around the Au BPN on  $\text{SiO}_2/\text{Si}$  substrate with water medium. Irradiation power: 1 mW.
